# Supplementary material
Source: publisher figshare collection journal article supplement (https://acs.figshare.com/ndownloader/files/21622488)
Supplement: Supplementary file 1 [file 21622488]

# **Behavior of Solid Electrolyte in Li-Polymer Battery with NMC Cathode via *in-situ* Scanning Electron Microscopy**

Shirin Kaboli<sup>1</sup>, Hendrix Demers<sup>1</sup>, Andrea Paoletta<sup>1</sup>, Ali Darwiche<sup>1</sup>, Martin Dontigny<sup>1</sup>, Daniel Clément<sup>1</sup>, Abdelbast Guerfi<sup>1</sup>, Michel L. Trudeau<sup>1</sup>, John B. Goodenough<sup>2</sup> and Karim Zaghib\*<sup>1</sup>

<sup>1</sup>Hydro-Québec's Center of Excellence in Transportation Electrification and Energy Storage, Varennes, Québec J3X 1S1, Canada

<sup>2</sup>University of Texas at Austin, 202 Spence St, College Station, TX 77840, United States

Keywords: *In-situ*, all-solid batteries, polymer degradation, NMC cathode, degassing, dendrites

\*Corresponding Author: zaghib.karim@hydro.qc.ca

## **SUPPORTING INFORMATION**

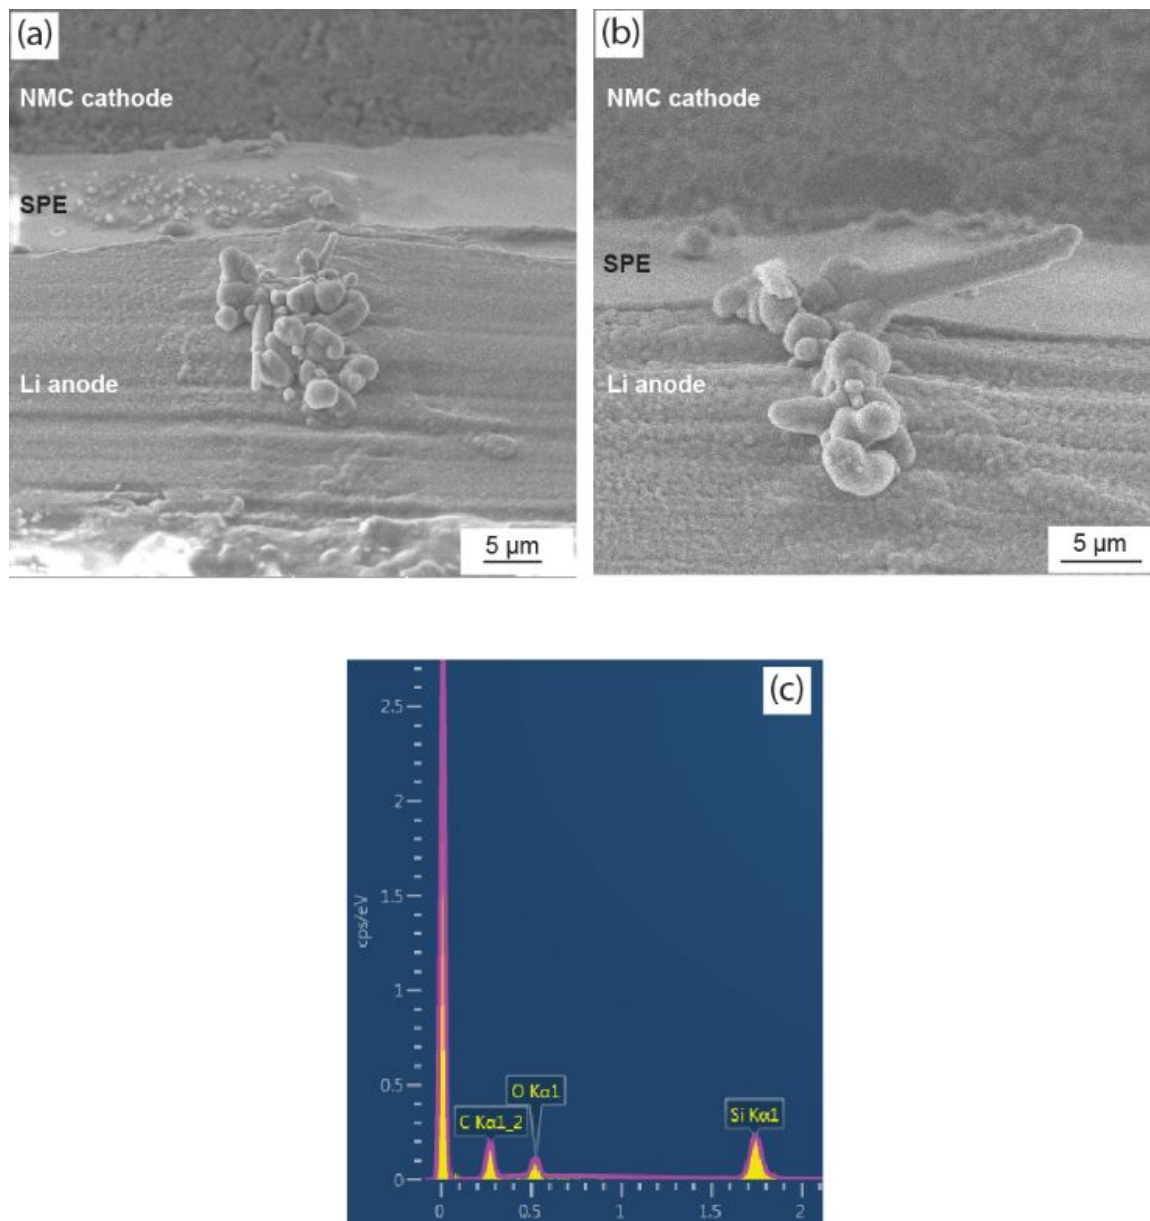

**Figure S1.** (a) and (b) More examples of dendrites forming in the Li anode during cycling with (c) the corresponding energy dispersive spectroscopy (EDS) analysis showing Li, C and O. The Si peak is due to the resin in the sample assembly.

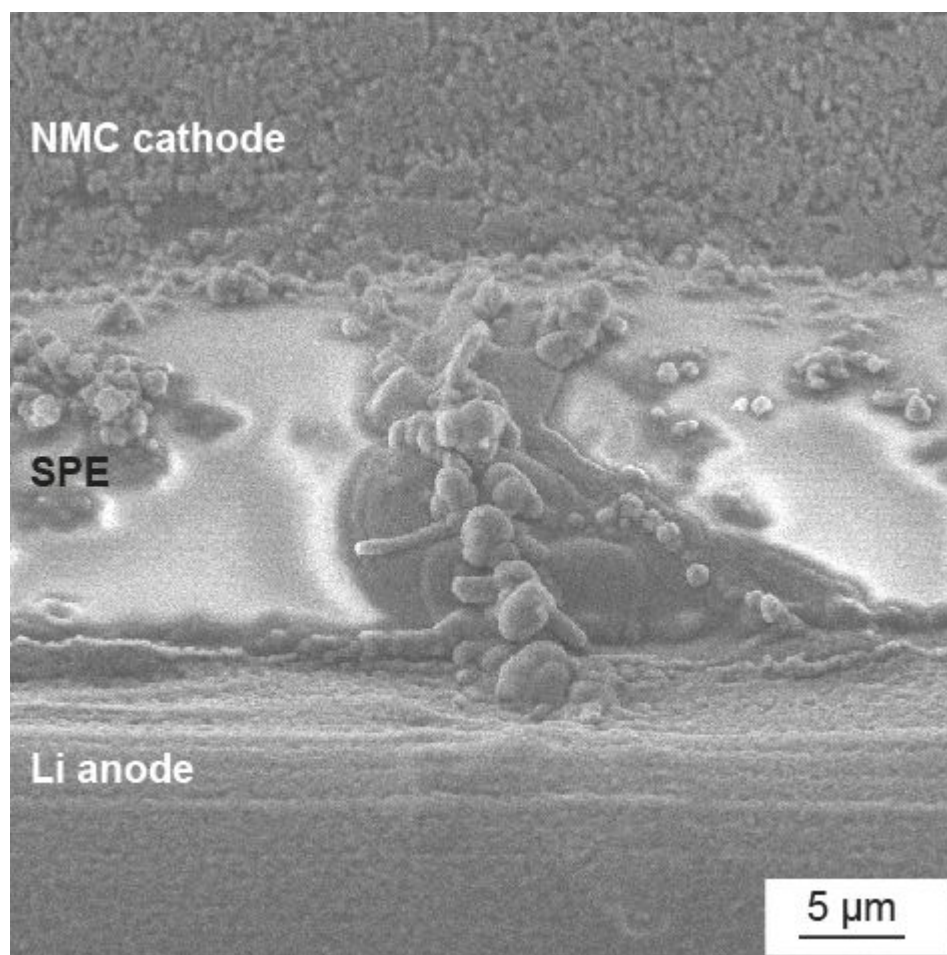

**Figure S2.** The path of Li dendrites connecting Li anode to the NMC cathode, leading to a short circuit of the cell.

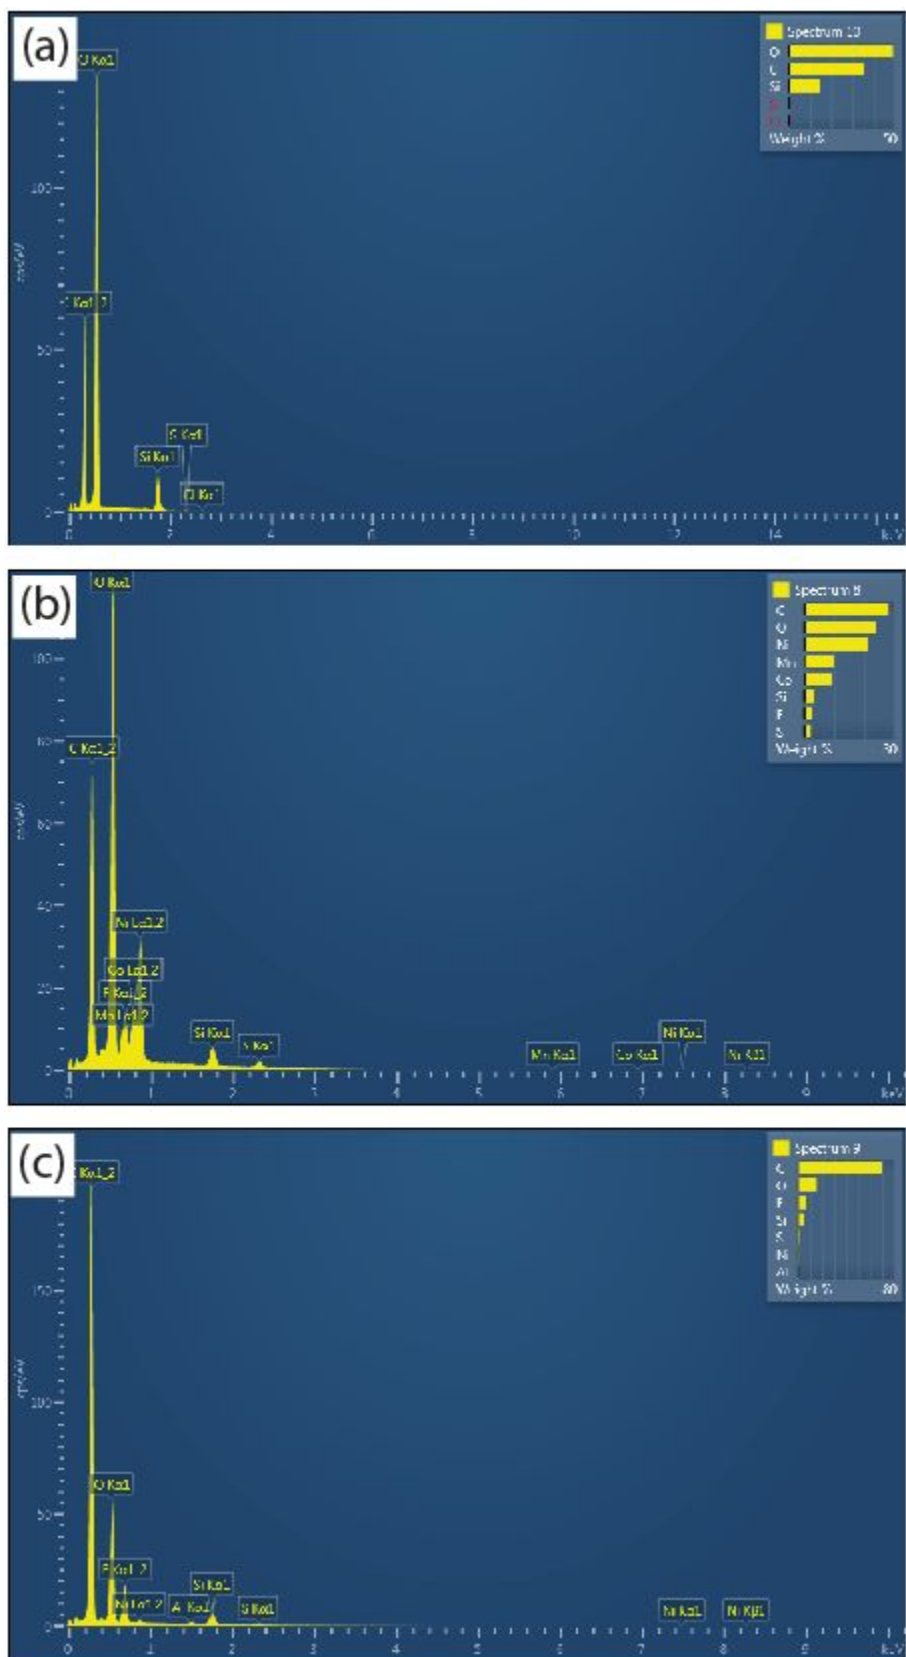

**Figure S3.** The energy dispersive spectroscopy (EDS) analysis of cell components after cycling from (a) Li anode, (b) SPE and (c) NMC cathode.

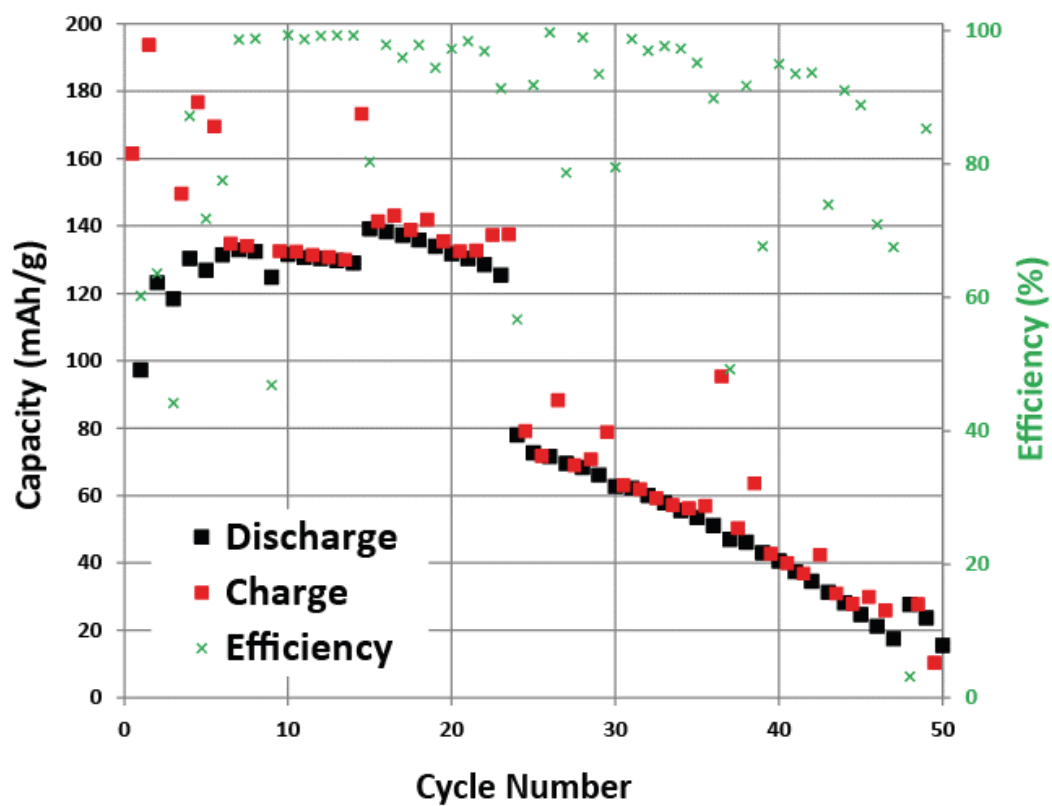

**Figure S4.** Plot of capacity and efficiency as a function of cycle number for the *in-situ* test shown in **Figure 2a** in the manuscript.
